# Supplementary material
Source: PubMed Central journal article supplement (PMC11189748)

## Supplementary Figure 1. Gene modification design

### A Wildtype sequence (TAO kinase 2 Exon 2):

TACCTACCTTTCTCAGCAGTACCTCCCCCTCATCAGTAAATGAGGGGAGGAGGAGGTAGAAACCTGAGGGA  
GGACCTCTCTCCCTCTGGGCCCTATCTTAGCTCTAAGGGTCCTATGTCCTTTTTCCAGGCAAGATCCCAATC  
TCAGGGCCCCCTGGGGCCATCATG**CCAGCTGGGGGCCGGGGAGCCTGAAGGACCCTGATGTGGCT**  
**GAGCTCTTCTTCAAGGATGACCCTGAGAAGCTCTTCTCTGACCTCCGGGAGATCGGCCATGGCAGCTTTGG**  
**AGCAGTGTACTTTGTGAGTTGGGTCTTGAAAAGGGTAAAGCAGGGCTCAGTCTCTTTCAACCTGTGGGTCT**  
CCAGGCCTCTGCACCACTCCACCAAATAATCCTTCCCACCCTCTTCTAATAGCTCAGCGGGTCCTCTTTCACC  
CCATGCCCAAGGTGGTCTTTTCCATCCTCCAATCTGGTCCTCTAGGCCCGGGATGTCCGGAACAGTGAGGTG  
GTGGCCATCAAGAAGATGTCCTATAGTGGGAAGCAATCAAATGAGGTGAGTCAGGTTGATTAACATCAGGTT  
GTGGAGGG

### Mutant Sequence:

TACCTACCTTTCTCAGCAGTACCTCCCCCTCATCAGTAAATGAGGGGAGGAGGAGGTAGAAACCTGAGGGA  
GGACCTCTCTCCCTCTGGGCCCTATCTTAGCTCTAAGGGTCCTATGTCCTTTTTCCAGGCAAGATCCCAATC  
TCAGGGCCCCCTGGGGCCATCATG**CCAGCTGGGGGCCGGGGAGCTCAGCCACTxxxxxxxxxxCTGA**  
**GCTCTTCTTCAAGGATGACCCTGAGAAGCTCTTCTCTGACCTCCGGGAGATCGGCCATGGCAGCTTTGGAG**  
**CAGTGTACTTTGTGAGTTGGGTCTTGAAAAGGGTAAAGCAGGGCTCAGTCTCTTTCAACCTGTGGGTCTCCA**  
GGCCTCTGCACCACTCCACCAAATAATCCTTCCCACCCTCTTCTAATAGCTCAGCGGGTCCTCTTTCACCCCAT  
GCCAAGGTGGTCTTTTCCATCCTCCAATCTGGTCCTCTAGGCCCGGGATGTCCGGAACAGTGAGGTGGTGG  
CCATCAAGAAGATGTCCTATAGTGGGAAGCAATCAAATGAGGTGAGTCAGGTTGATTAACATCAGGTTGTGG  
AGGG

**TCAGCCACT – inversion of part of the deleted sequence**

**xxxxxxxxxx – 10 bp deletion = out of frame mutation; premature stop in exon 4**

### B Wildtype sequence (seizure related 6 homolog like 2 (Sez6l2) Exon 2 ATG in Exon 1):

AGGATGTAGAGGAATGGAGAGGTTACAGGACTTCACCTCCTAGGTCTGCCCTGAAGGAGGATGAGATG  
ATGCCAGAGCCTGGAAGTGAGACTCCACAGTGGCCTCTGAGGACCTGGCTGAGCTGCTCCATGGGGCTT  
TGCTGCGGAAGGGCCAGAGATCGGCTTCTTGCCGGGTGAGGCCACAGTGTGGCATAGGAGTAGAGAG  
AGAGGCTATGTCGCTGAGAGCTGGAGTGCCTGGCTAGAGGGAAGGCGGGTTAGAGAGAGTTCTGTGGGA  
GAGACCCCTAGGAAGCTGAGAAAGAGTCAAAGCTGGCC

### Mutant Sequence:

AGGATGTAGAGGAATGGAGAGGTTACAGGACTTCACCTCCTAGGTCTGCCCTGAAGGAGGATGAGATG  
ATGCCAGAGCCTGGAAGTGAGACTCCACAGTGGCCTCTGAGGACCTGGCTGAGCTGCTCCATGGGG:.....  
:.....:CCAGAGATCGGCTTCTTGCCGGGTGAGGCCACAGTGTGGCATAGGAGTAGAGAGAGAGGCTATG  
TCGCTGAGAGCTGGAGTGCCTGGCTAGAGGGAAGGCGGGTTAGAGAGAGTTCTGTGGGAGAGACCCCTA  
GGAAGCTGAGAAAGAGTCAAAGCTGGCC

**:.....: – 17 bp deletion = out of frame mutation; premature stop in exon 3**

C

Wildtype sequence (major vault protein (Mvp) Exon 2; Exon 3; ATG in Exon 1):

TCACCATGGCAACTGAAGAGGCCATCATCCGCATCCCCCATACTACTACATCCATGTGCTGGACCAGAACA  
GTAATGTGTCCCGTGTAGAGGTTGGACCAAAGACCTACATCCGGCAGGACAATGAGAGGTTGGTGTAGAG  
CTGTCCCAGCCTGGCTGGTGGGAATGACCCTCATCTGGGTGGCCGGGAGGTTTCTCTTGCTTTTACTGTCTCC  
TTTGGAACATCATCCTGGCTCCTCACGCCCTTCTTATCTTACAACAGGGTACTGTTTGCCCCAGTTCGCATGG  
TGACGGTCCCACCACGCCACTACTGCATAGTGGCCAACCCTGTGTCCCGGGACGCCAGAGTTCTGTGTTGT  
TTGACGTCAC

Mutant Sequence:

TCACCATGGCAACTGAAGAGGCCATCATCCGCATCCCCCATACTACTACATCCATGTGCTGGACCAGAACA  
GTAATGTGTCCCGTGTAGAGGTTGGACCAAAGACCTAC**T**ATCCGGCAGGACAAT**TGA**GAGGTTGGTGTAGA  
GCTGTCCCAGCCTGGCTGGTGGGAATGACCCTCATCTGGGTGGCCGGGAGGTTTCTCTTGCTTTTACTGTCT  
CCTTTGGAACATCATCCTGGCTCCTCACGCCCTTCTTATCTTACAACAGGGTACTGTTTGCCCCAGTTCGCAT  
GGTGACGGTCCCACCACGCCACTACTGCATAGTGGCCAACCCTGTGTCCCGGGACGCCAGAGTTCTGTGTT  
GTTTGACGTCAC

**T** – 1 bp insertion = out of frame mutation; premature stop (**TGA**) in exon 2

Supplementary Figure 2. Expression of genes adjacent to those modified in 3g del/+ mice

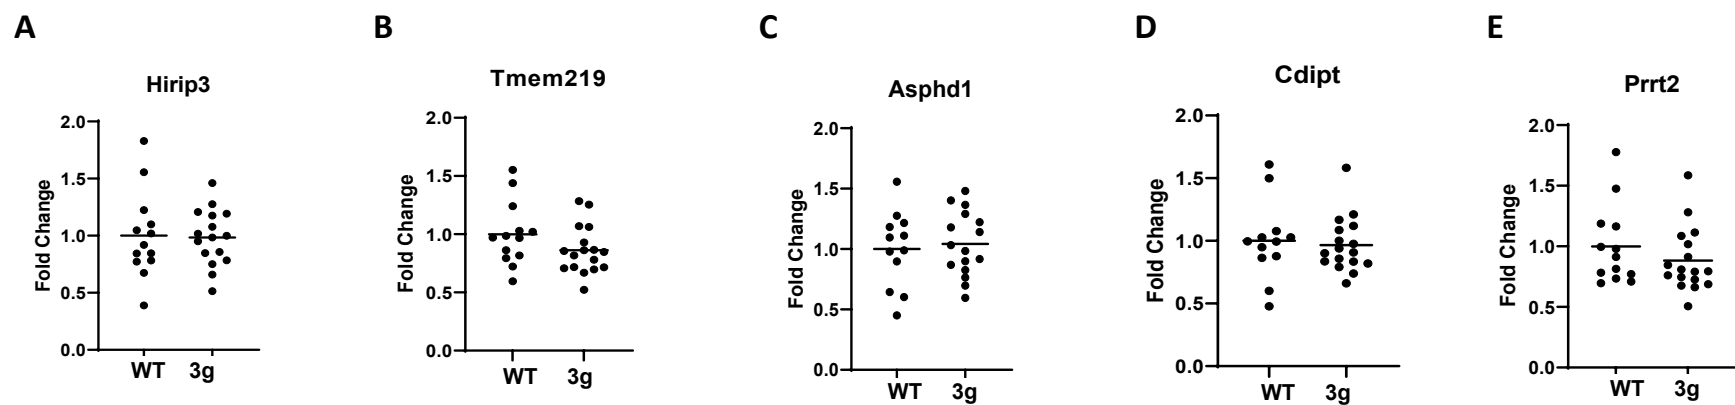

Supplementary Figure 3. 3g del/+ mice are obtained at a Mendelian frequency and male 3g del/+ mice show a decrease in body weight

A

### 3g del/+ male mouse x wt female mouse

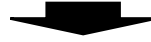

|        | WT (number of animals) | 3g del/+ (number of animals) | 3g del/+ inheritance (%) |
|--------|------------------------|------------------------------|--------------------------|
| Male   | 62                     | 58                           | 48.33                    |
| Female | 47                     | 44                           | 48.35                    |

B

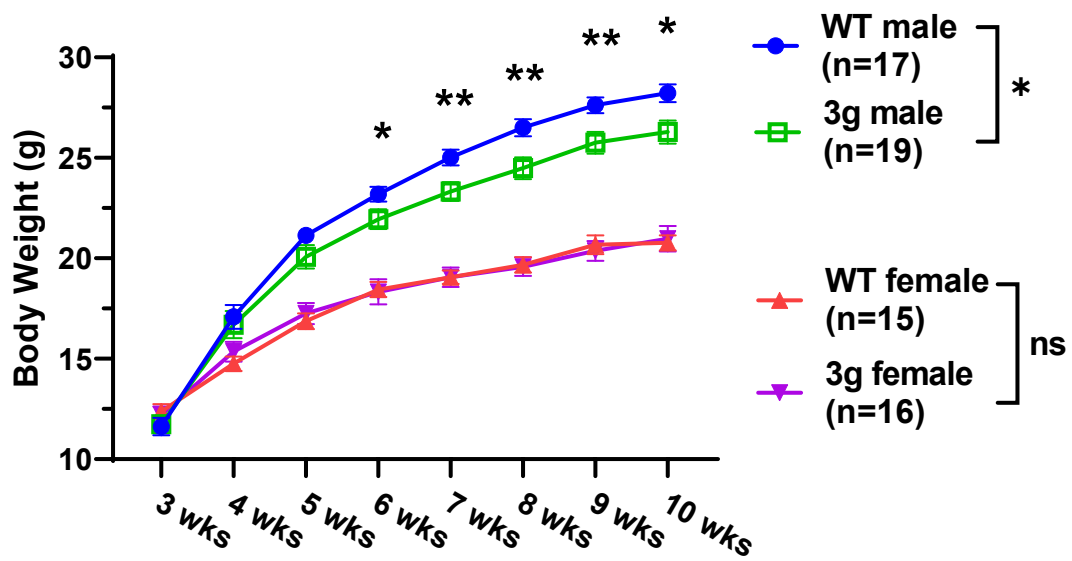

Supplementary Figure 4. Rotarod test did not show any difference between 3g del/+ mice and wt mice

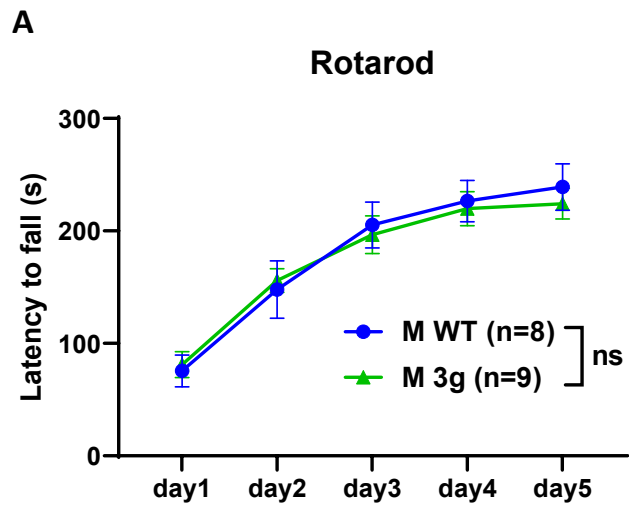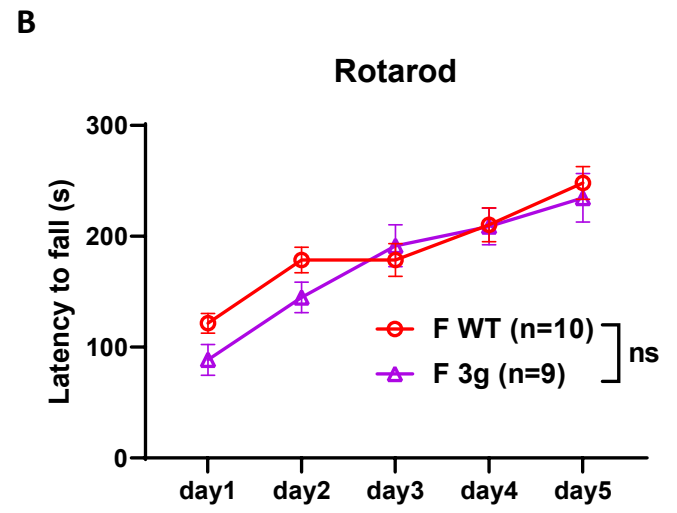

# Supplementary Figure 5. Body weight during food restriction

**A**

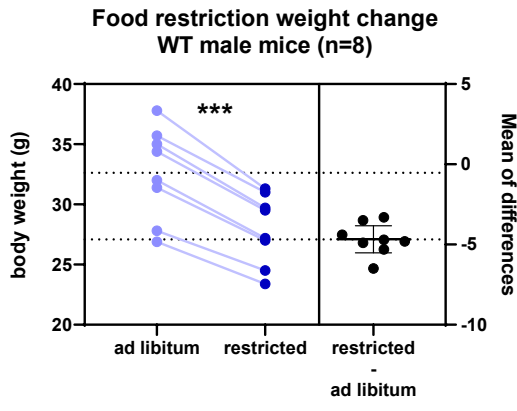

**B**

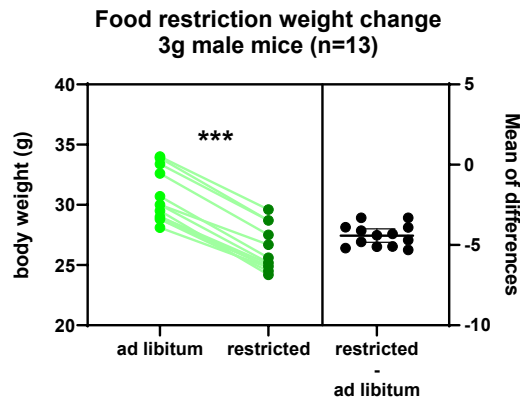

**C**

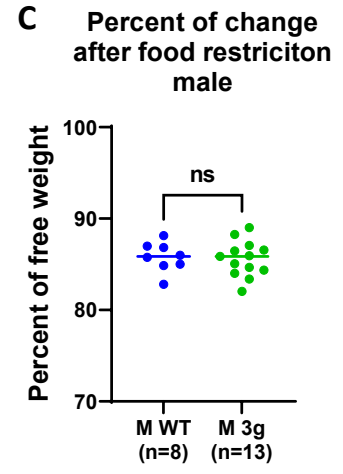

**D**

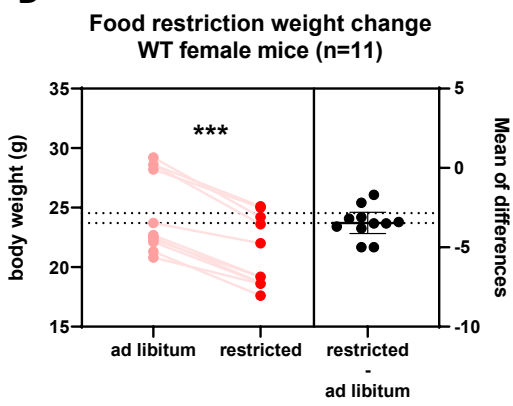

**E**

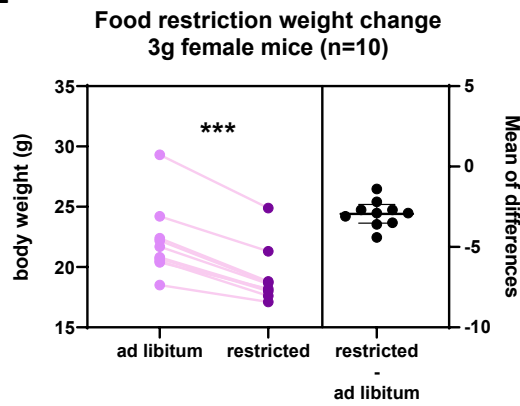

**F**

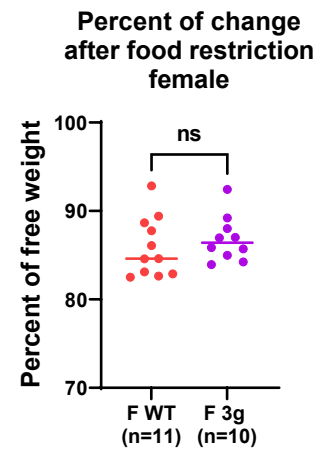

**Supplementary Figure 6. 16p11.2 del/+ male mice show decreased break points in progressive ratio compared to sex- and age- matched wt mice**

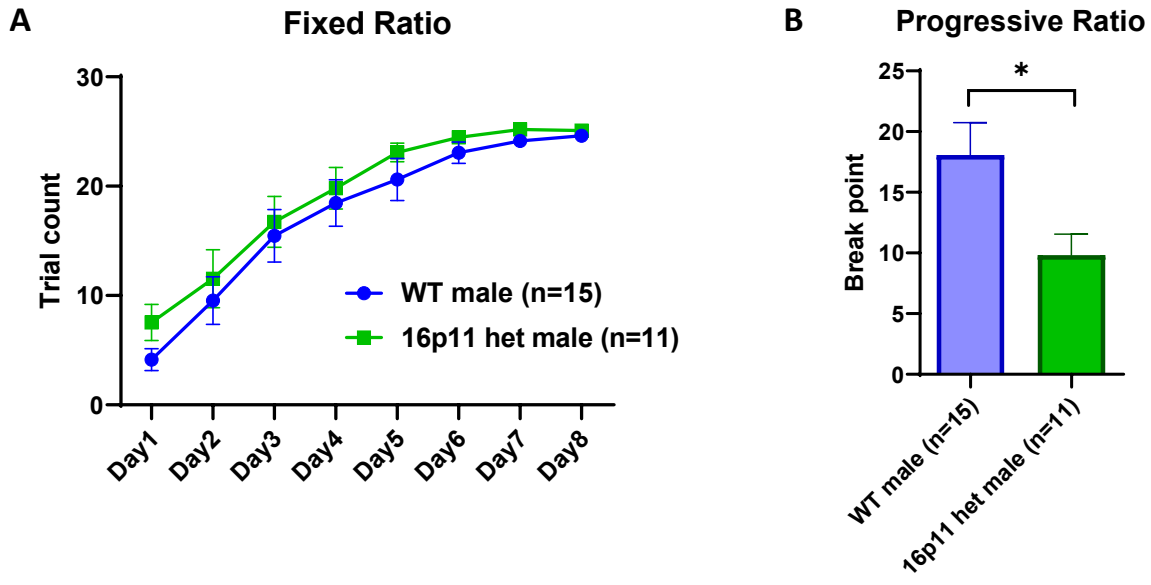

Supplementary Figure 7. Additional behavioral phenotypes of 3g del/+ mice

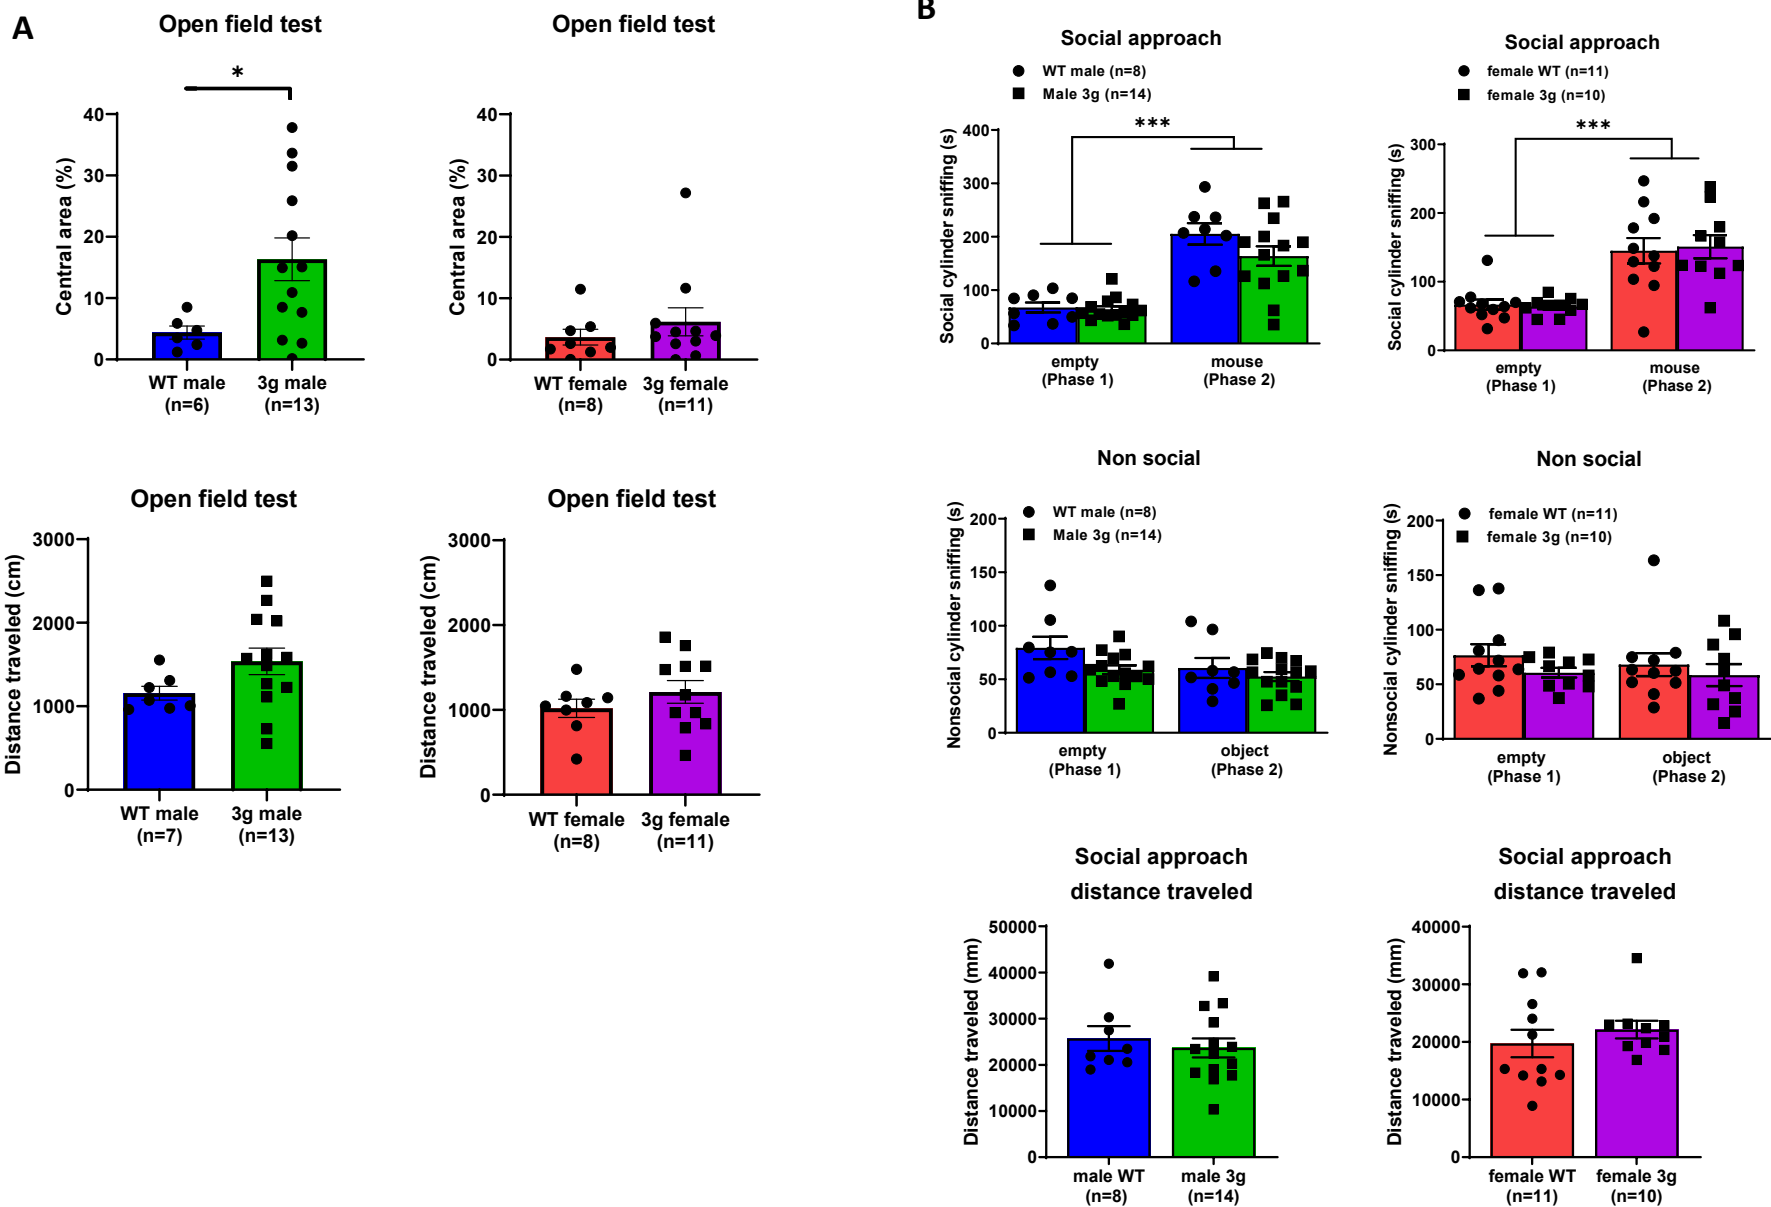



**Supplementary Figure 8. Labeling ribosomal genes in 248 DEGs and overlapped genes with SFARI genes**

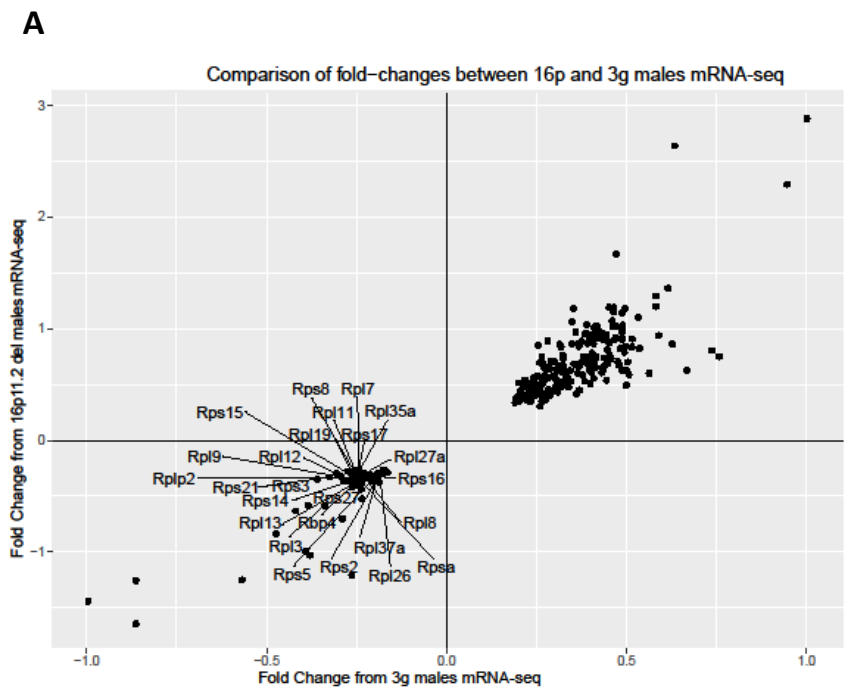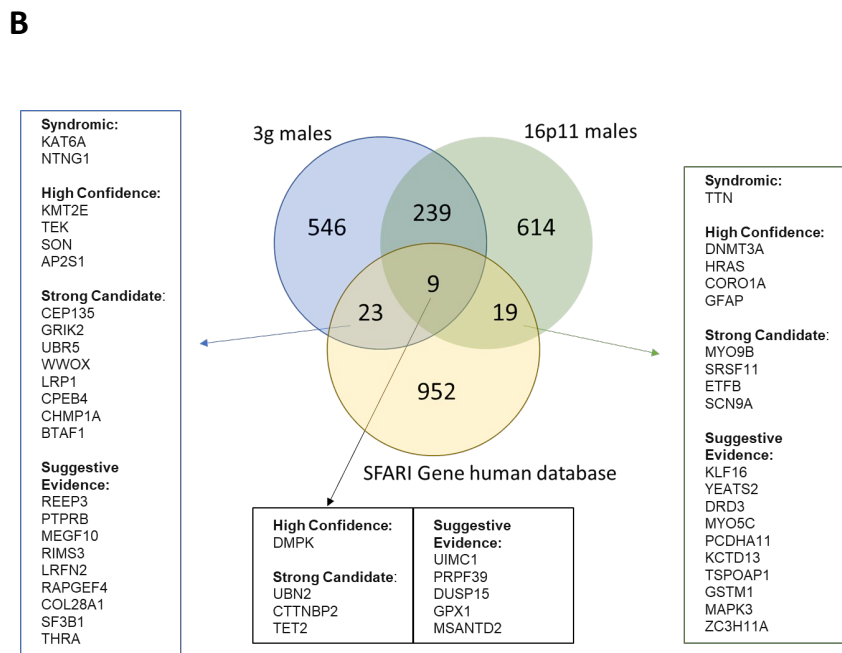

**Supplementary Figure 9. Ribosome profiling in the striatum of 3g del/+ and 16p11.2 del/+ male mice and mTOR in 3g del/+ mice**

**A**

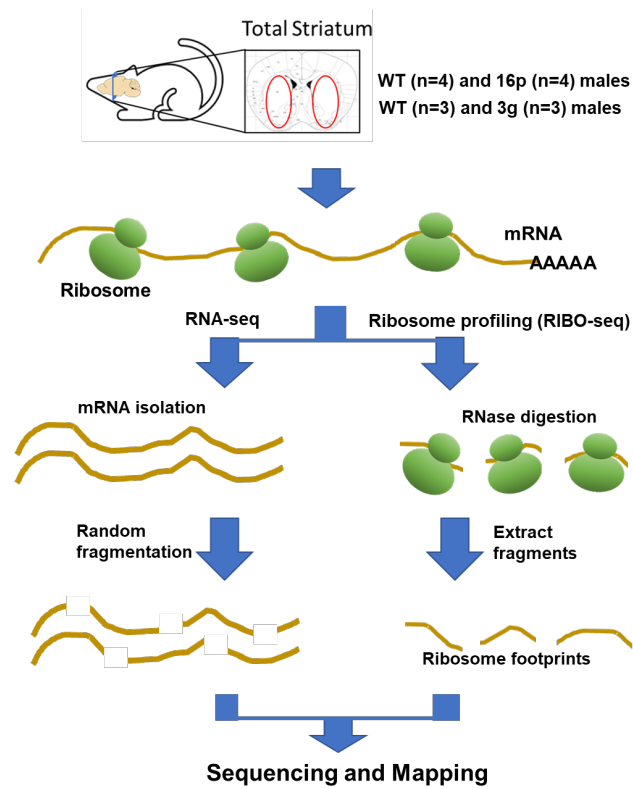

**B**

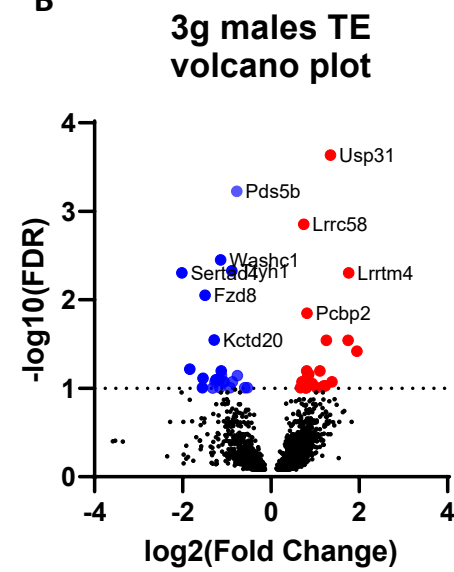

**C**

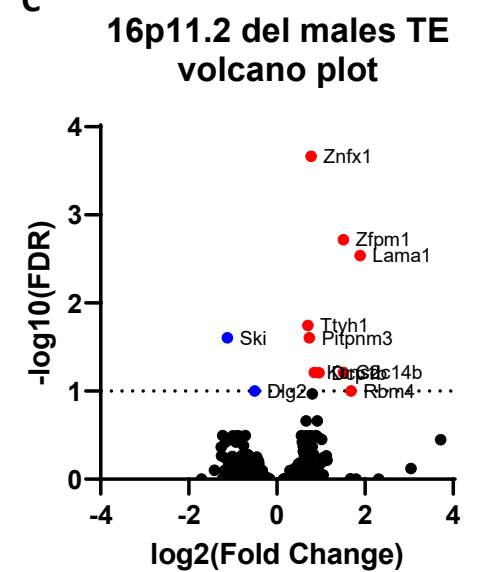

**D**

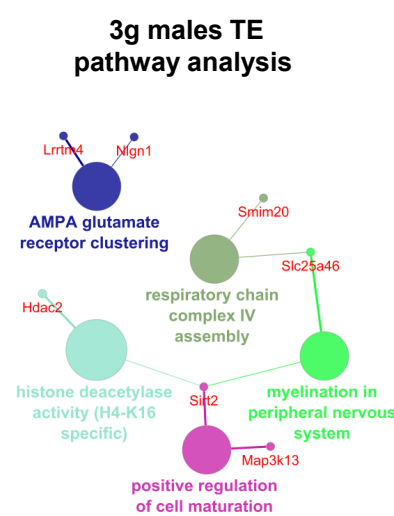

**E**

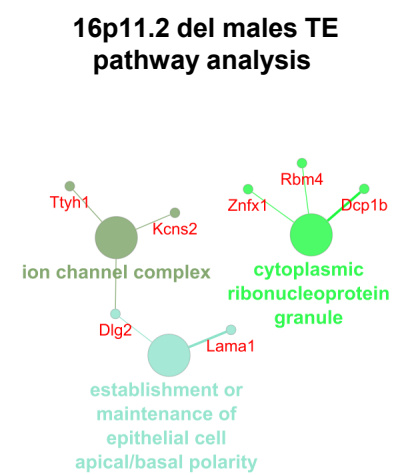

**F**

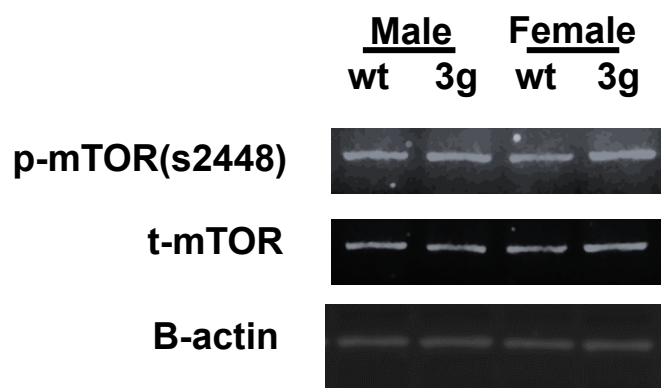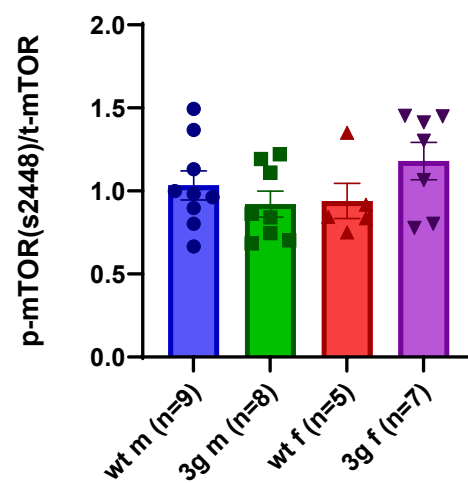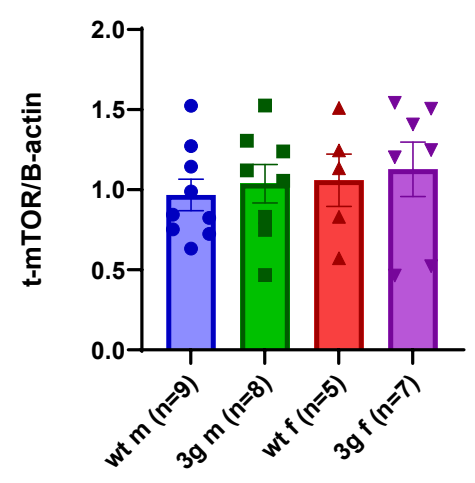

Supplementary Figure 10. Pathway analysis of RNAseq results from 3g males (569 DEGs)

A

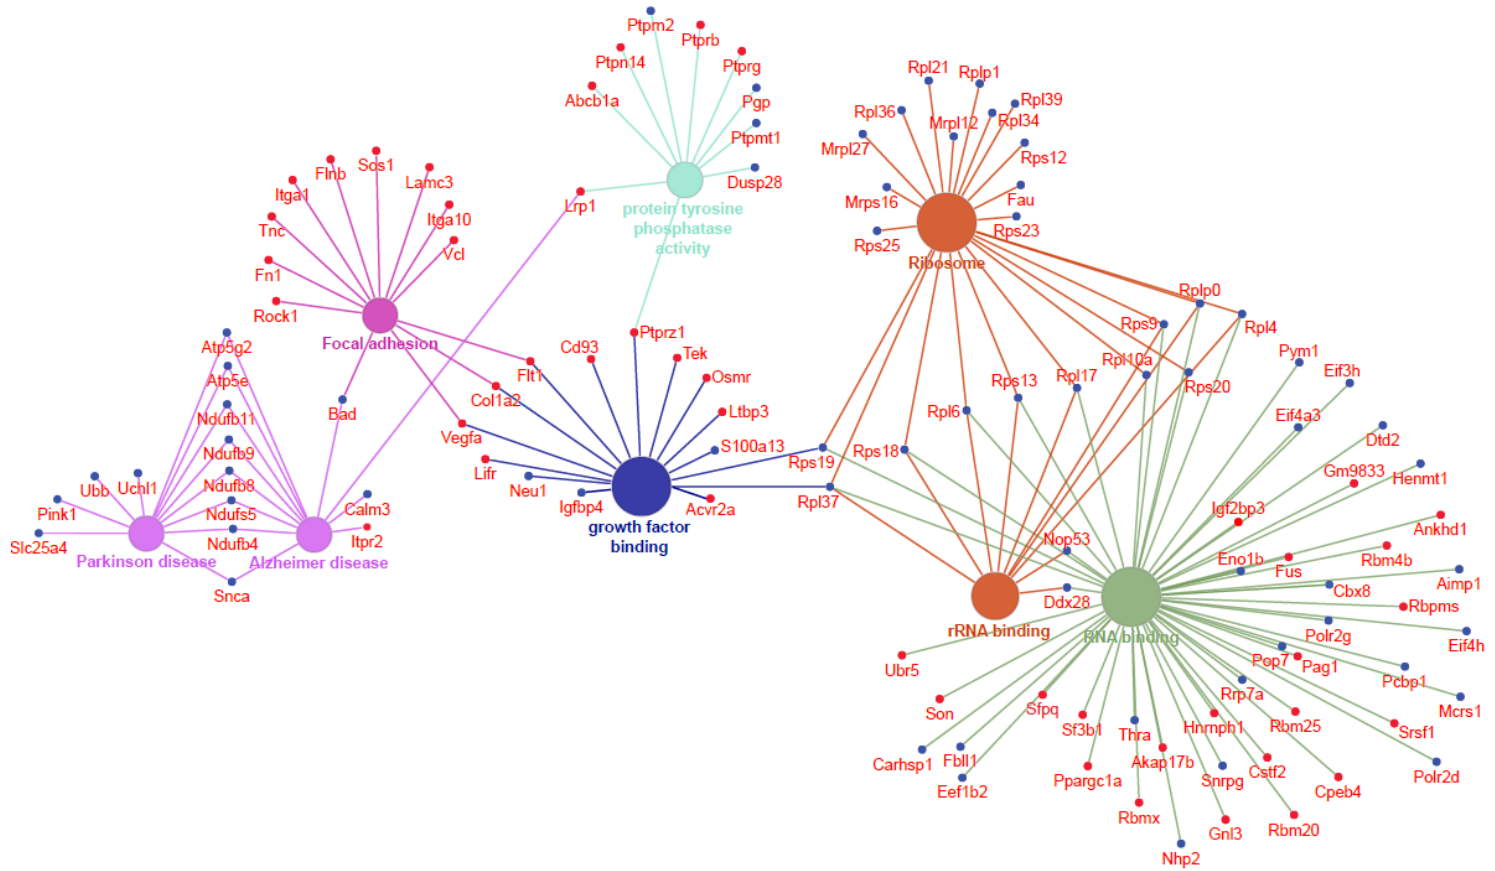

B

Reactome pathways

$-\log_{10}(\text{FDR})$

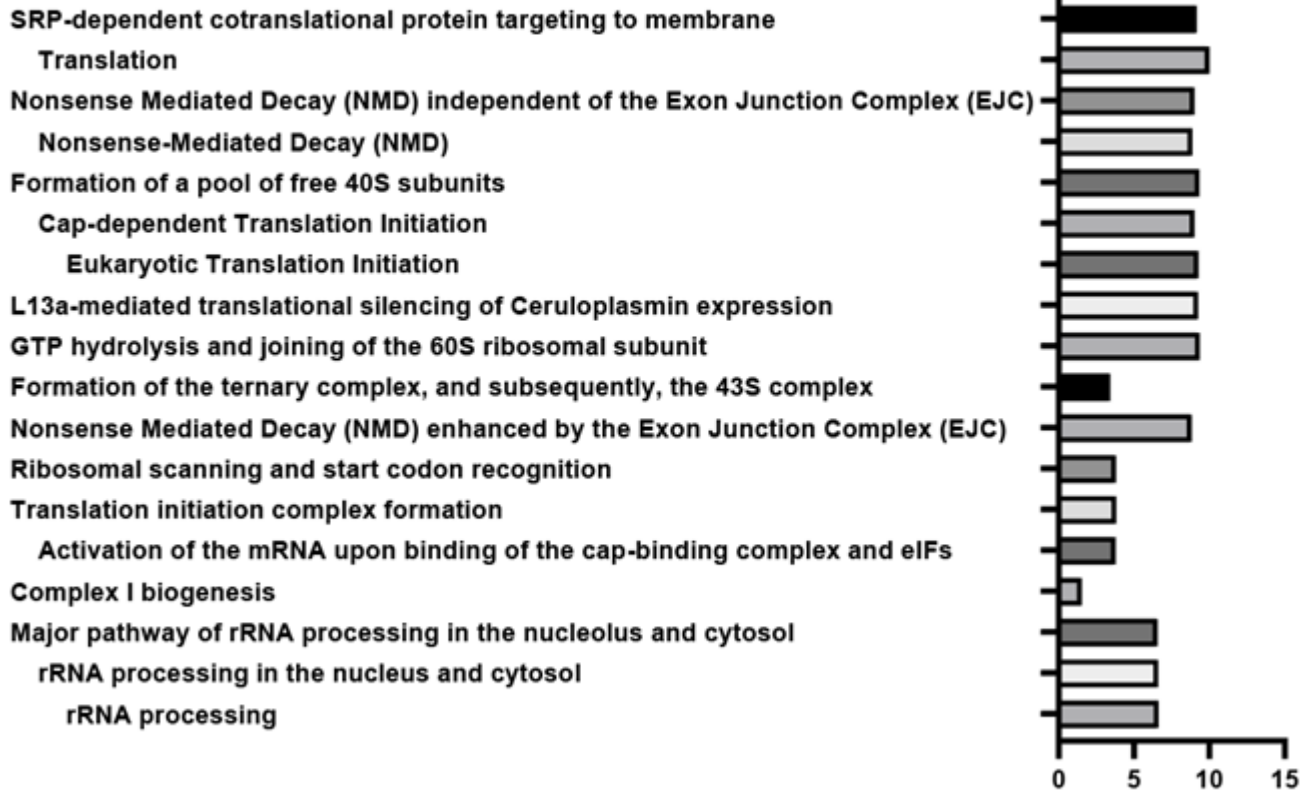

Supplementary Figure 11. Pathway analysis of RNAseq results from 16p11.2 males (633 DEGs)

A

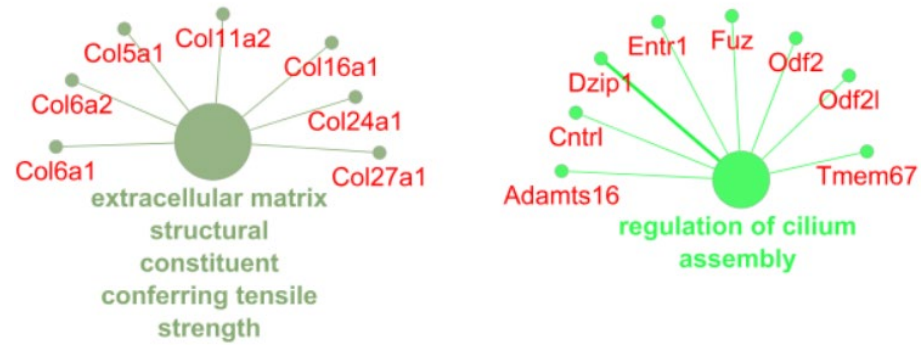

B

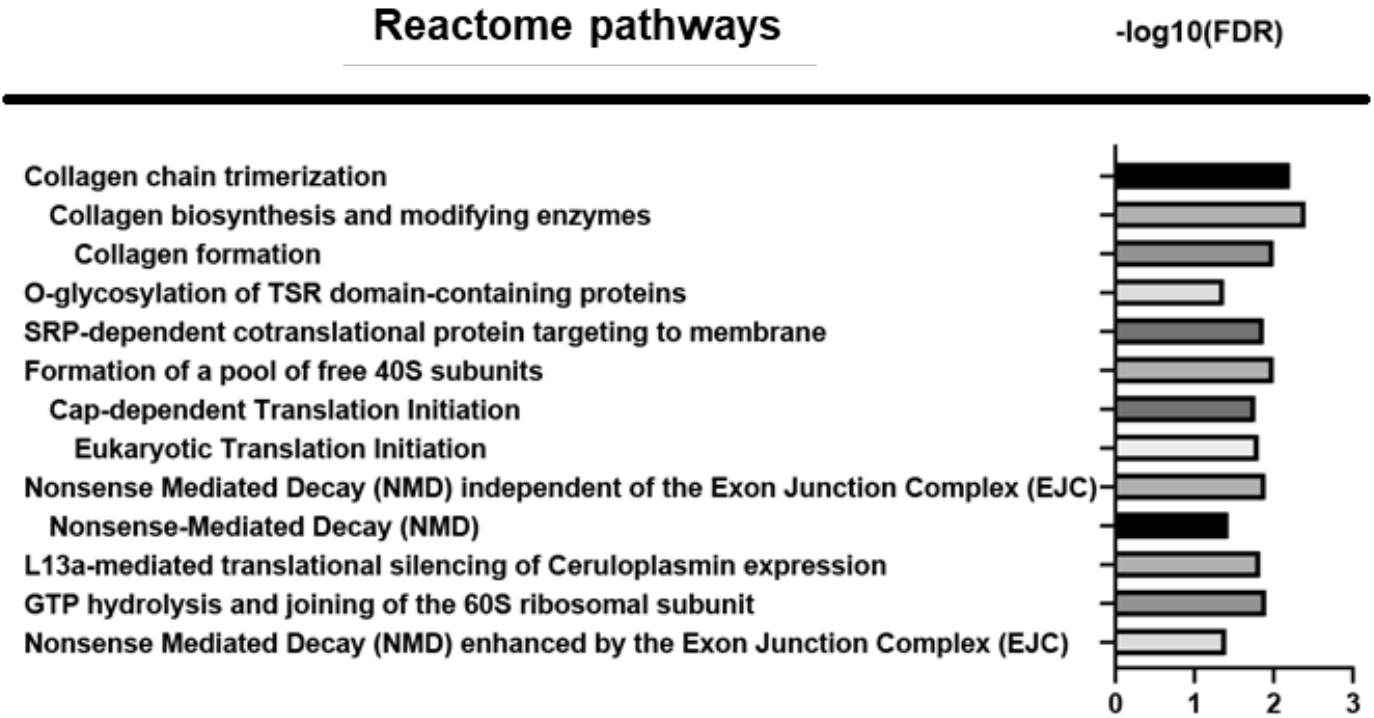

# Supplementary Figure 12. Pathway analysis of RNAseq results from 3g females (340 DEGs)

A

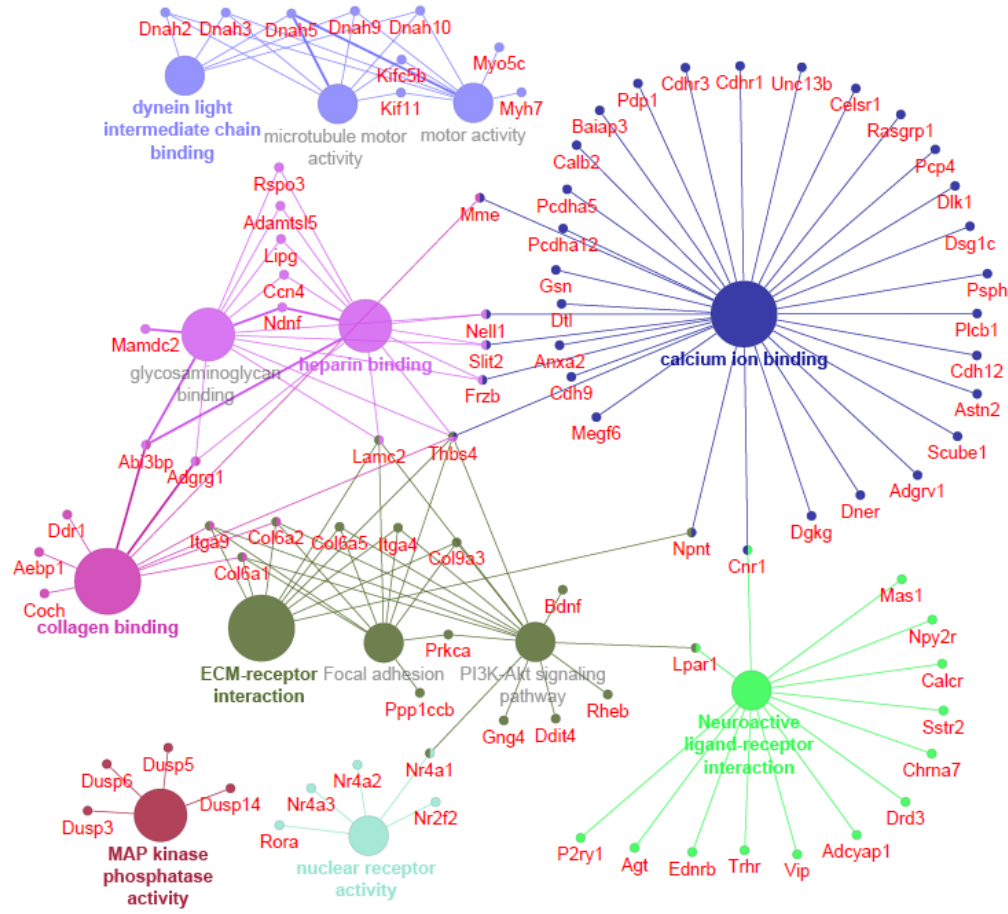

B

## Reactome pathways

$-\log_{10}(\text{FDR})$

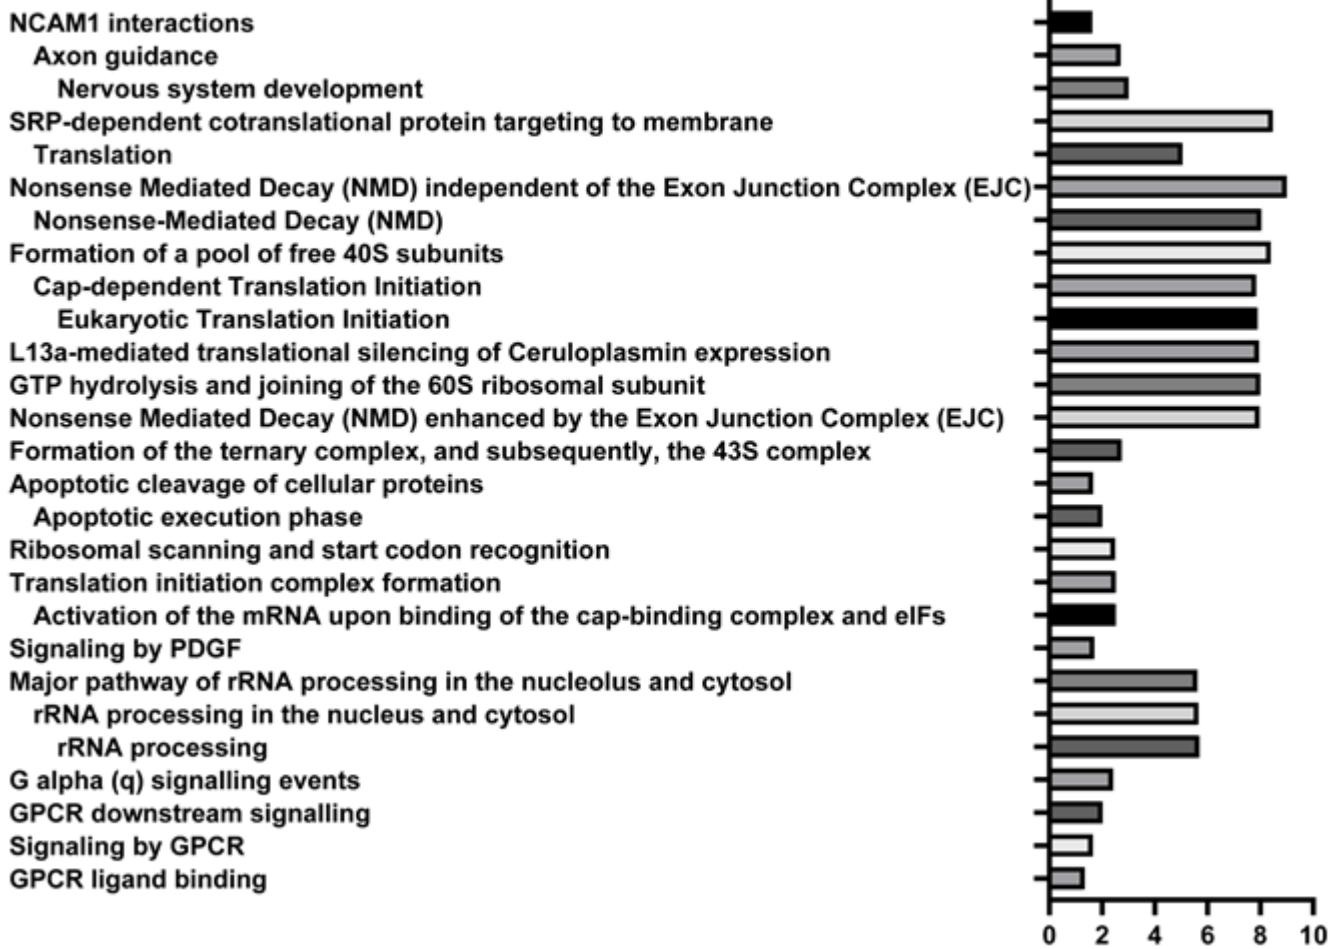

Supplementary Figure 13. Pathway analysis of RNAseq results from 16p11.2 females (121 DEGs)

A

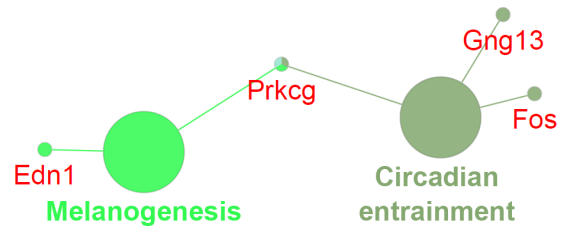

B

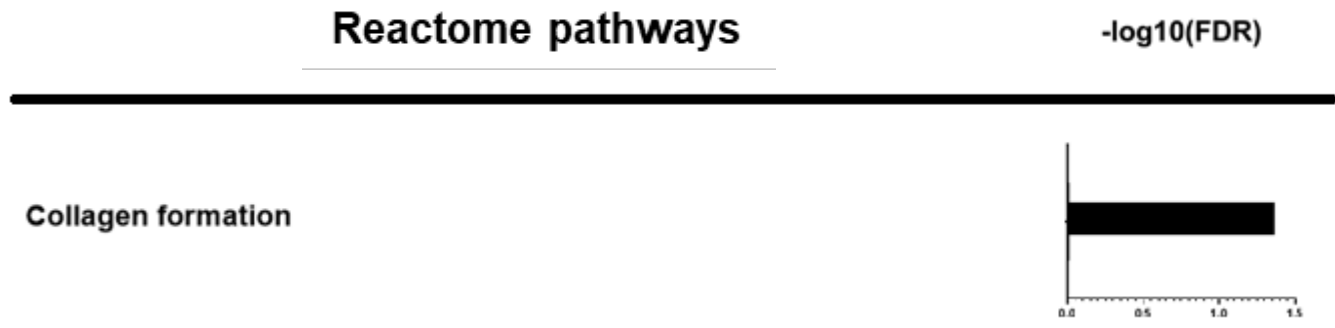



**Supplementary Figure 14. Fiber tract changes in 3g mice compared to wild types**

3g males (6-week-old)

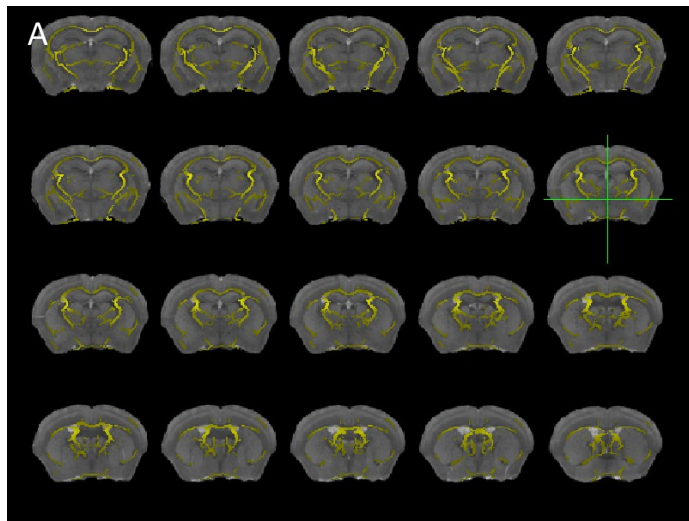

3g females (6-week-old)

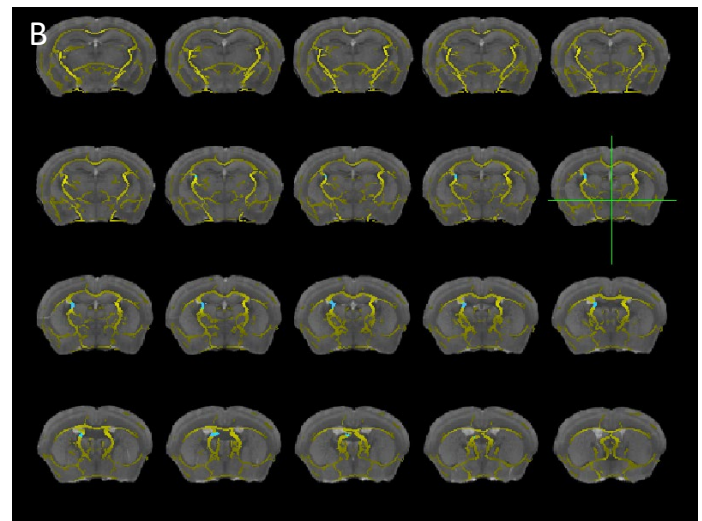

16p11.2 males (6-week-old)

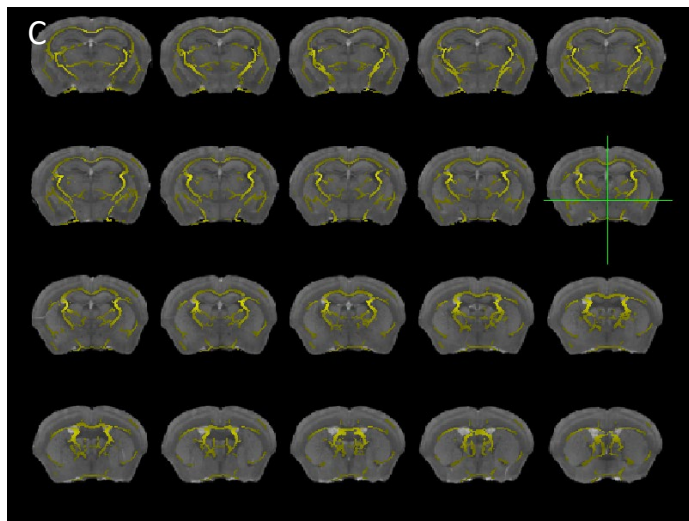

16p11.2 females (6-week-old)

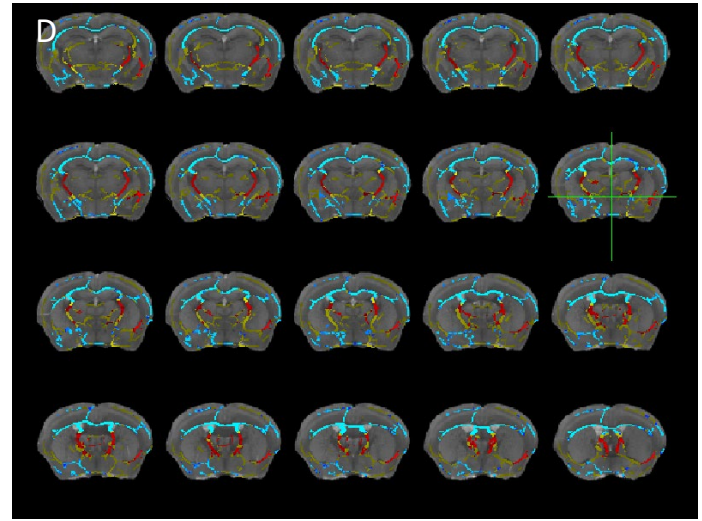

3g males (16-week-old)

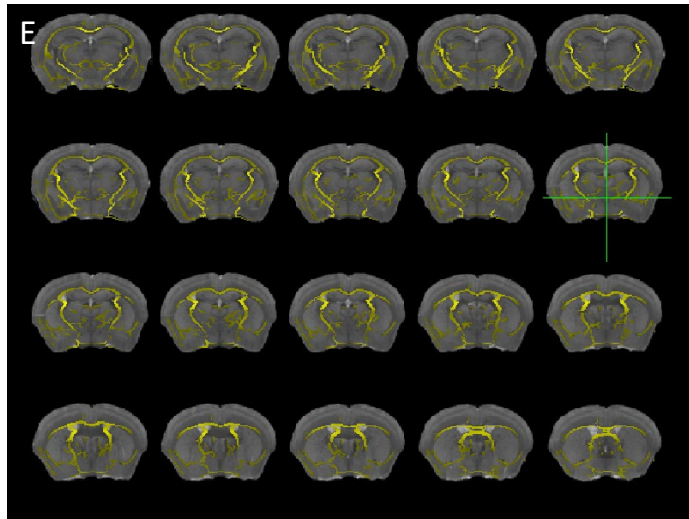

3g females (16-week-old)

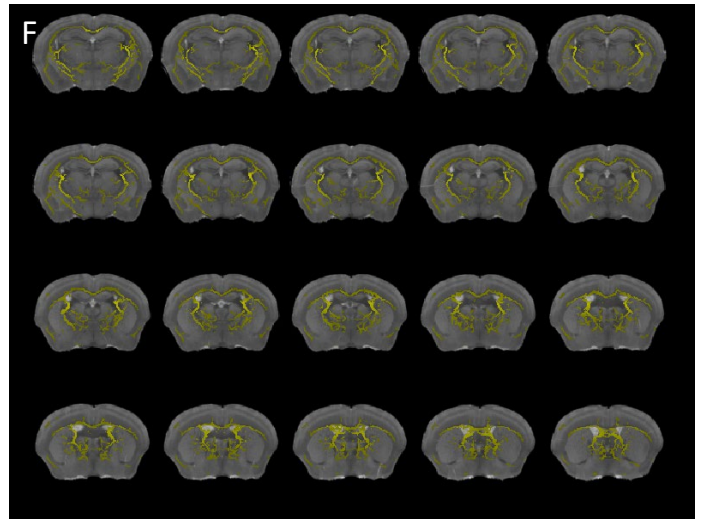

16p11.2 males (10-week-old)

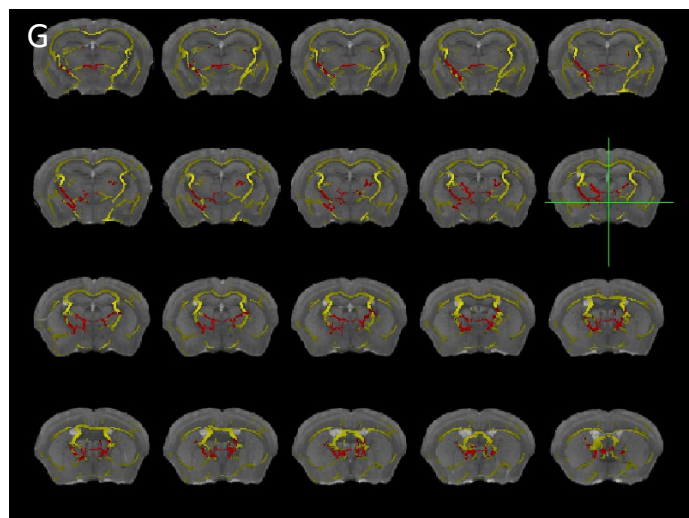

Supplementary Figure 15. ERK activation after sucrose consumption in 3g del/+ and wt mice and StEP expression in 3g del/+ mice

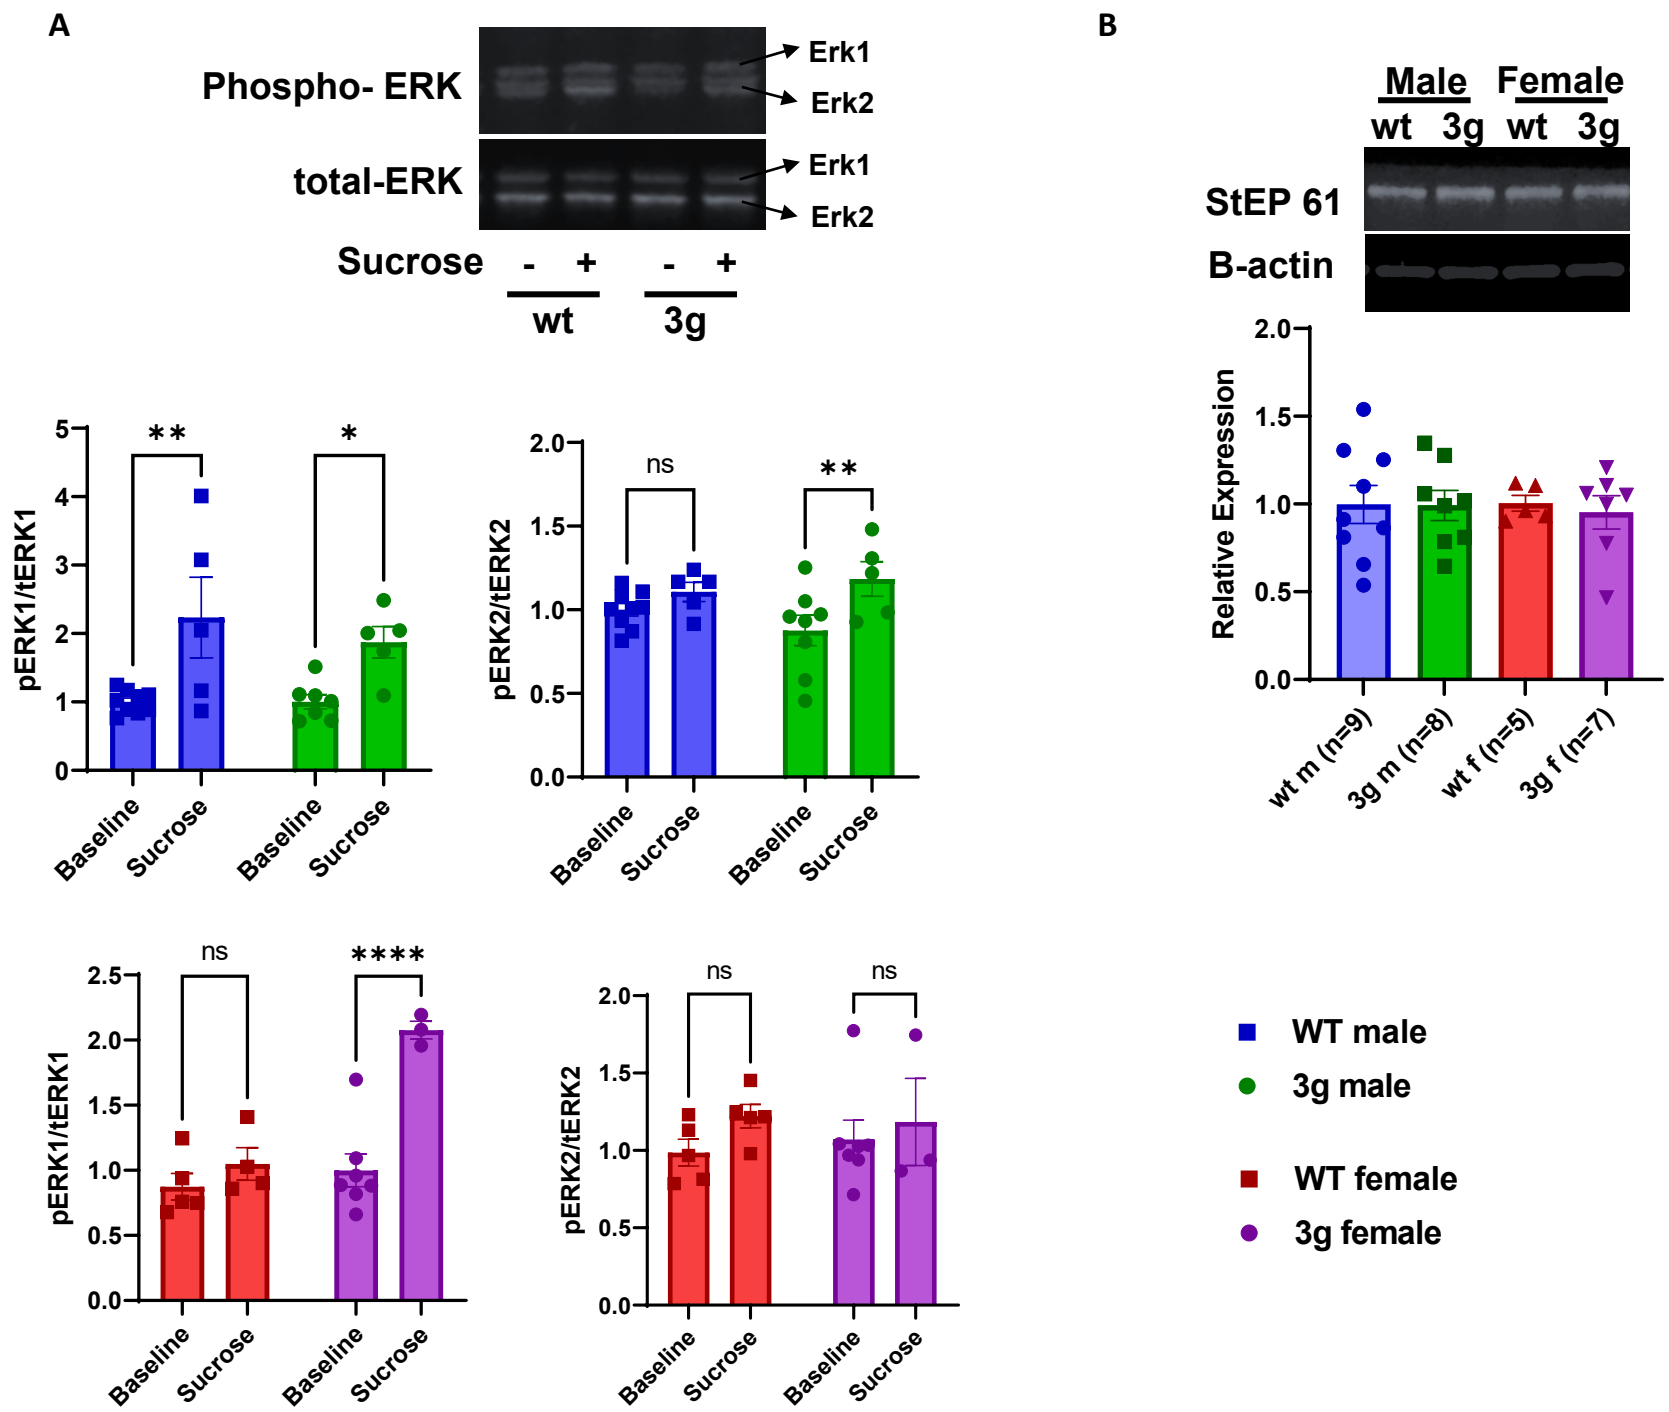



**Supplementary Figure 16. 4 gene hemi-deletion validation (qPCR) and additional phenotypes of 4g del/+ mice**

**A**

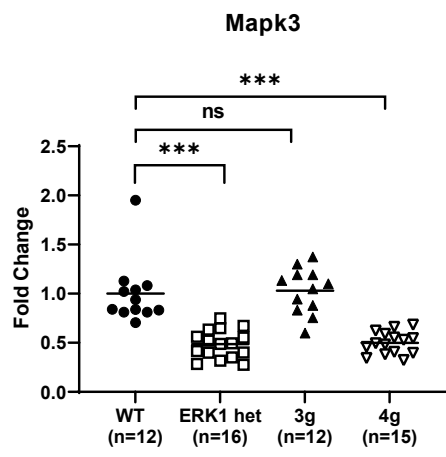

**B**

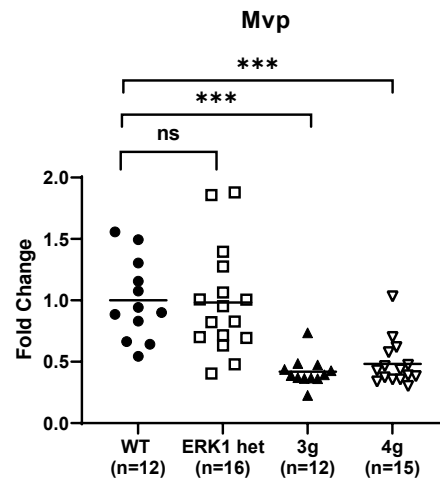

**C**

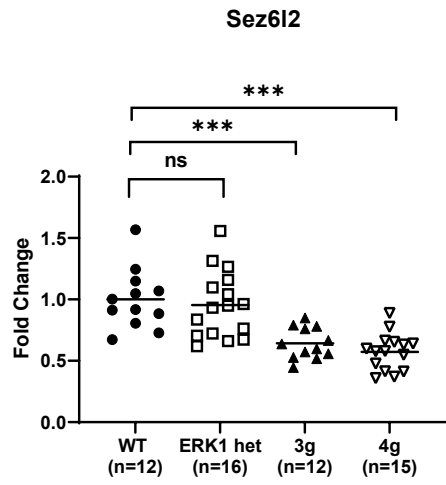

**D**

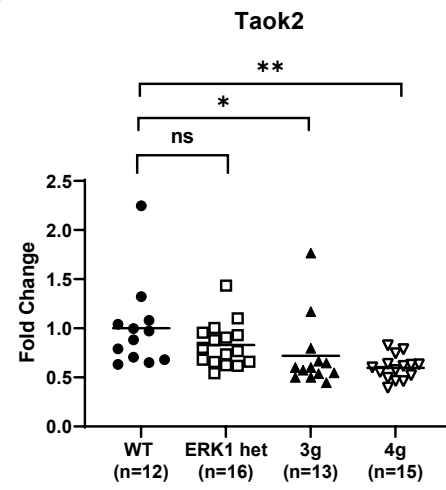

**E**

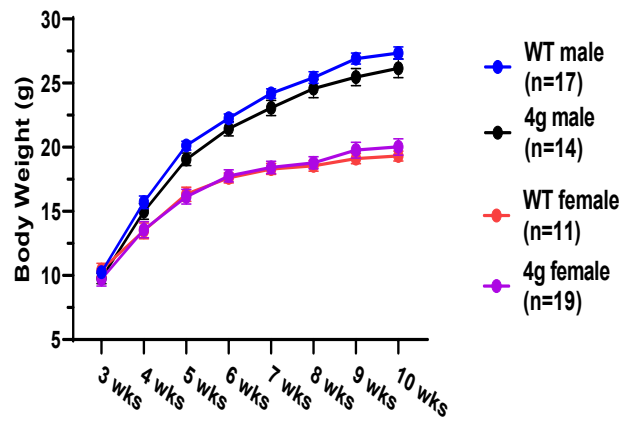

**F**

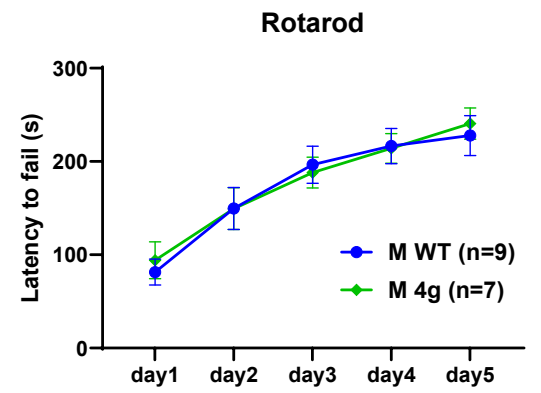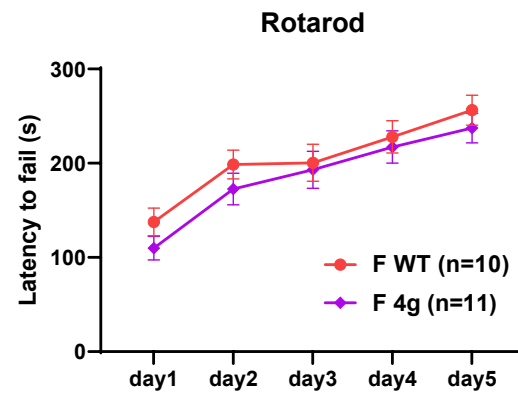

# Supplementary Figure 17. Graphic abstract

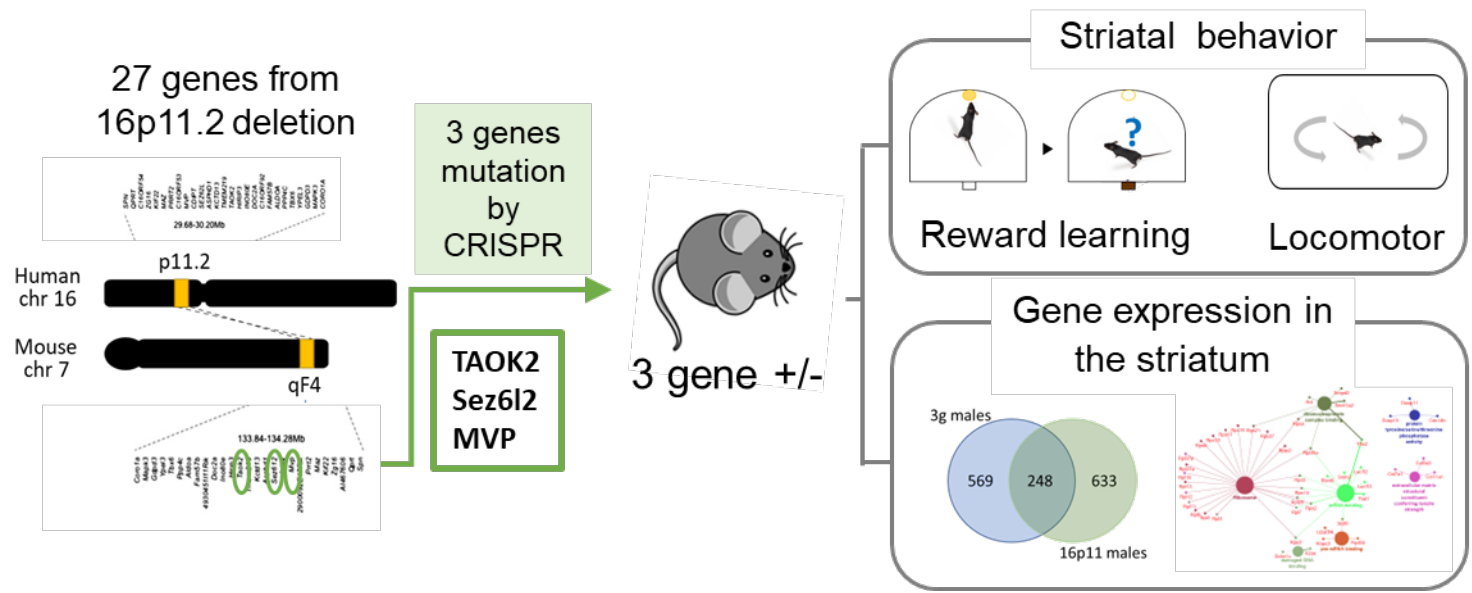

Supplement: NIHMS1979884-supplement-Kim_Sup_Figure.pdf [file NIHMS1979884-supplement-Kim_Sup_Figure.pdf]
